# Supplementary material for: In the Alphaproteobacterium Hyphomicrobium denitrificans SoxR Serves a Sulfane Sulfur-Responsive Repressor of Sulfur Oxidation
Source: Preprints.org preprint supplement (doi:10.20944/preprints202307.0868.v1), 2023-07-13
Supplement: Supplementary file 1 [file supplementary]

**Table S1.** Strains, plasmids and primers

| Strains primers or plasmids                                   | Relevant genotype, description or sequence                                                                                                                                                                     | Reference or source |
|---------------------------------------------------------------|----------------------------------------------------------------------------------------------------------------------------------------------------------------------------------------------------------------|---------------------|
| <b>Strains</b>                                                |                                                                                                                                                                                                                |                     |
| <i>E. coli</i> 10-beta                                        | $\Delta(ara-leu)$ 7697 <i>araD139 fhuA</i> $\Delta lacX74 galK16 galE15 e14-$ $\phi 80dlacZ\Delta M15$ <i>recA1 relA1 endA1 nupG rpsL</i> (Str <sup>R</sup> ) <i>rph spoT1</i> $\Delta(mrr-hsdRMS-mcrBC)$      | New England Biolabs |
| <i>E. coli</i> DH5 $\alpha$                                   | F <sup>-</sup> $\phi 80lacZ\Delta M15 \Delta(lacZYA-argF)U169$ <i>recA1 endA1 hsdR17</i> (r <sub>K</sub> <sup>-</sup> , m <sub>K</sub> <sup>+</sup> ) <i>phoA supE44</i> $\lambda$ - <i>thi-1 gyrA96 relA1</i> | New England Biolabs |
| <i>E. coli</i> BL21 (DE3)                                     | F- <i>ompT hsdS<sub>B</sub></i> (r <sub>B</sub> <sup>-</sup> , m <sub>B</sub> <sup>-</sup> ) <i>gal dcm</i> (DE3)                                                                                              | Novagen             |
| <i>Hyphomicrobium denitrificans</i> $\Delta tsdA$             | Sm <sup>r</sup> , in-frame deletion of <i>tsdA</i> in <i>H. denitrificans</i> Sm200                                                                                                                            | [1]                 |
| <i>Hyphomicrobium denitrificans</i> $\Delta tsdA \Delta shdR$ | Sm <sup>R</sup> , in-frame deletion of <i>shdR</i> (Hden_0682) in <i>H. denitrificans</i> $\Delta tsdA$                                                                                                        | [2]                 |
| <i>Hyphomicrobium denitrificans</i> $\Delta tsdA \Delta soxR$ | Sm <sup>R</sup> , deletion of <i>soxR</i> (Hden_0700) in <i>H. denitrificans</i> $\Delta tsdA$                                                                                                                 | This work           |
| <b>Primers</b>                                                |                                                                                                                                                                                                                |                     |
| EMSA-Fr                                                       | TTCCCGCCCCGCTTGGTTT                                                                                                                                                                                            | [2]                 |
| EMSA_Fr2_Fr                                                   | TCAGCGCTCGCCTGGAAGTC                                                                                                                                                                                           | This work           |
| EMSA_Fr3_Rev                                                  | TCTAAGCATCAACATATTCATATCTTTATATATTTTCG                                                                                                                                                                         | This work           |
| EMSA-Rev                                                      | AGGAGTTGCATCCAAAAAAGCGTG                                                                                                                                                                                       | [2]                 |
| EMSA-Hden_0703/04-fw                                          | GGGTCACCAAATTCTGCAGGTCTC                                                                                                                                                                                       | This work           |
| EMSA-Hden_0703/04-rev                                         | ATCACGCCATCTCTCCCGGAA                                                                                                                                                                                          | This work           |
| EMSA-Hden_0699/0698-fw                                        | AATTCCACGGCTCCGCC                                                                                                                                                                                              | This work           |
| EMSA-Hden_0699/0698-rev                                       | TCGACAGCTTGCGGAAATCC                                                                                                                                                                                           | This work           |
| EMSA-sHdrR-LipS1_F                                            | TAGAGCGAGTCTTCAGC                                                                                                                                                                                              | This work           |
| EMSA-sHdrR-LipS1_R                                            | CGGCCCTCTGAGAAAAG                                                                                                                                                                                              | This work           |
| EMSA-LipX-DsrE_F                                              | GACTTCGCCGATCAATCGATC                                                                                                                                                                                          | This work           |
| EMSA-LipX-DsrE_R                                              | TGCCACCTCCCCGATATG                                                                                                                                                                                             | This work           |
| rpoB-denitf                                                   | AGGACGTGTTACCTCGATT                                                                                                                                                                                            | [3]                 |
| rpoB-denitr                                                   | CGGCTTCGTCAAGTTCTTC                                                                                                                                                                                            | [3]                 |
| SoxT1A 0681_qPCR-Fr                                           | CCCAGTGATACGATTGCGA                                                                                                                                                                                            | This work           |
| SoxT1A 0681_qPCR-Rev                                          | CTAAAATGCCGCCGGTGATG                                                                                                                                                                                           | This work           |
| LplA_qPCR-Fr                                                  | GGCCATGATCGATTTGCACC                                                                                                                                                                                           | This work           |
| LplA_qPCR-Rev                                                 | CGAGATAAATTGCACCGCCG                                                                                                                                                                                           | This work           |
| sHdrA_qPCR-Fr                                                 | CCGATCACCATTCCGTTCTGA                                                                                                                                                                                          | This work           |
| sHdrA_qPCR-Rev                                                | CAATTGTTTCCGGGCCGATC                                                                                                                                                                                           | This work           |

|                                                   |                                                                                                        |           |
|---------------------------------------------------|--------------------------------------------------------------------------------------------------------|-----------|
| sHdrB2_qPCR-Fr                                    | GACGTGGCCTACTATTCCGG                                                                                   | This work |
| sHdrB2_qPCR-Rev                                   | CCGCGACGACAGATAGGTTT                                                                                   | This work |
| LbpA2_qPCR-Fr                                     | GGTTCCAAGAGCAGCCTGAT                                                                                   | This work |
| LbpA2_qPCR-Rev                                    | TCGTTGATCTCCAGAACCGC                                                                                   | This work |
| SoxXA_qPCR-Fr                                     | CGGCGCTCATTACCTATCTC                                                                                   | This work |
| SoxXA_qPCR-Rev                                    | TCGGGGTGTCTTTTTCAGTC                                                                                   | This work |
| TusA_qPCR-Fr                                      | TCTGACAGTTGATGCCAAGG                                                                                   | This work |
| TusA_qPCR-Rev                                     | CGTTTCCTCATGTTCAAGCA                                                                                   | This work |
| CytP450_qPCR-Fr                                   | CAATACGGTTCTCGGACGTT                                                                                   | This work |
| CytP450_qPCR-Rev                                  | CATTTCGTTTCCTGACGAGGT                                                                                  | This work |
| SoxT1B (0699)_qPCR-Fr                             | GCCGCCGTCTCAGTAAATAA                                                                                   | This work |
| SoxT1B (0699)_qPCR-Rev                            | AGCAGAAGACGGCAGATGAT                                                                                   | This work |
| SoxR_qPCR-Fr                                      | TGAAGCGGACGAGGAAGTAT                                                                                   | This work |
| SoxR_qPCR-Rev                                     | GAGACTGTGGGCTGGTTGAT                                                                                   | This work |
| sHdrR_qPCR-Fr                                     | TTAGGAAGTCCGCATCGTCT                                                                                   | This work |
| sHdrR_qPCR-Rev                                    | GCACTCGTTGCGCAATAATA                                                                                   | This work |
| SoxY_qPCR-Fr                                      | GTTCAGCTTGCGGACTTTTC                                                                                   | This work |
| SoxY_qPCR-Rev                                     | GCCAATCGTCACCTTCACTT                                                                                   | This work |
| P1 fwd up hden_0700                               | TATA <b>CTGCAGG</b> ATCAAGGACGTGGTGGCG (PstI)                                                          | This work |
| P2 rev up hden_0700                               | CTCTCTATCGTTTGCGGCTCCATTCCCTATCCCTCGGTCGC                                                              | This work |
| P3 fwd down hden_0700                             | GCGCACCGAGGGATAGGAATGGAGCCGCAAACGATAGAGAG                                                              | This work |
| P4 rev down hden_0700                             | GTACT <b>CTAGA</b> ACGAACGCTGCCAGAAGCCC (XbaI)                                                         | This work |
| pET22 SoxR-Strep fw                               | TATA <b>CATATG</b> TGGAGCCACCCGCAGTTTCGAGAAAGCTAGCTCGGGCATCTTGCCAAAC (NdeI)                            | This work |
| pET22 SoxR-Strep rev                              | TGCT <b>AAGCTT</b> CTATCGTTTGCGGCTCGGTT (HindIII)                                                      | This work |
| SoxR C(50)S_fwd                                   | CTGATCCTCTCCCTGCTCGCTG                                                                                 | This work |
| SoxR C(50)S_rev                                   | CAGGCGGGATTCTGTGAGC                                                                                    | This work |
| SoxR C(116)S_fwd                                  | GATAAGTTTTCCCGCGAGGAAC                                                                                 | This work |
| SoxR C(116)S_rev                                  | GTAGATGGCGCCGATGAA                                                                                     | This work |
| <b>Plasmids</b>                                   |                                                                                                        |           |
| pET-22b(+)                                        | Ap <sup>r</sup>                                                                                        | Novagen   |
| pET-22b-SoxR-N-Strep                              | Ap <sup>r</sup> , NdeI/HindIII fragment of amplified SoxR in Nde/HindIII of pET                        | This work |
| pET-22b-SoxR C <sup>50</sup> S                    | Ap <sup>r</sup> , pET-22b-SoxR-N-Strep with a Cys <sup>50</sup> Ser exchange                           | This work |
| pET-22b-SoxR C <sup>116</sup> S                   | Ap <sup>r</sup> , pET-22b-SoxR-N-Strep with a Cys <sup>116</sup> Ser exchange                          | This work |
| pET-22b-SoxR C <sup>50</sup> S C <sup>116</sup> S | Ap <sup>r</sup> , pET-22b-SoxR-N-Strep with Cys <sup>50</sup> Ser and Cys <sup>116</sup> Ser exchanges | This work |

|                                       |                                                                                                                                                                                                     |           |
|---------------------------------------|-----------------------------------------------------------------------------------------------------------------------------------------------------------------------------------------------------|-----------|
| pk18 <i>mobsacB</i> -Tc               | Km <sup>r</sup> , Tc <sup>r</sup> pHP45ΩTc tetracycline cassette inserted into pk18 <i>mobsacB</i> using SmaI                                                                                       | [2]       |
| pk18 <i>mobsacB</i> _Tc_Δ <i>soxR</i> | Km <sup>r</sup> , Tc <sup>r</sup> , 1.04 kb SOE PCR fragment implementing deletion of nucleotides 4 to 362 of <i>soxR</i> cloned into pk18 <i>mobsacB</i> -Tc using PstI and XbaI restriction sites | This work |

---

## References

1. Koch, T.; Dahl, C. A novel bacterial sulfur oxidation pathway provides a new link between the cycles of organic and inorganic sulfur compounds. *ISME J.* **2018**, *12*, 2479-2491.
2. Li, J.; Koch, J.; Flegler, W.; Garcia Ruiz, L.; Hager, N.; Ballas, A.; Tanabe, T.S.; Dahl, C. A metabolic puzzle: consumption of C<sub>1</sub> compounds and thiosulfate in *Hyphomicrobium denitrificans* X<sup>T</sup>. *Biochim. Biophys. Acta - Bioenergetics* **2022**, *1864*, 148932.
3. Martineau, C.; Mauffrey, F.; Villemur, R. Comparative analysis of denitrifying activities of *Hyphomicrobium nitratorans*, *Hyphomicrobium denitrificans*, and *Hyphomicrobium zavarzinii*. *Appl. Environ. Microbiol.* **2015**, *81*, 5003-5014.
