# Supplementary material for: In the Alphaproteobacterium Hyphomicrobium denitrificans SoxR Serves a Sulfane Sulfur-Responsive Repressor of Sulfur Oxidation
Source: Preprints.org preprint supplement (doi:10.20944/preprints202307.0868.v1), 2023-07-13

## SoxR wildtype

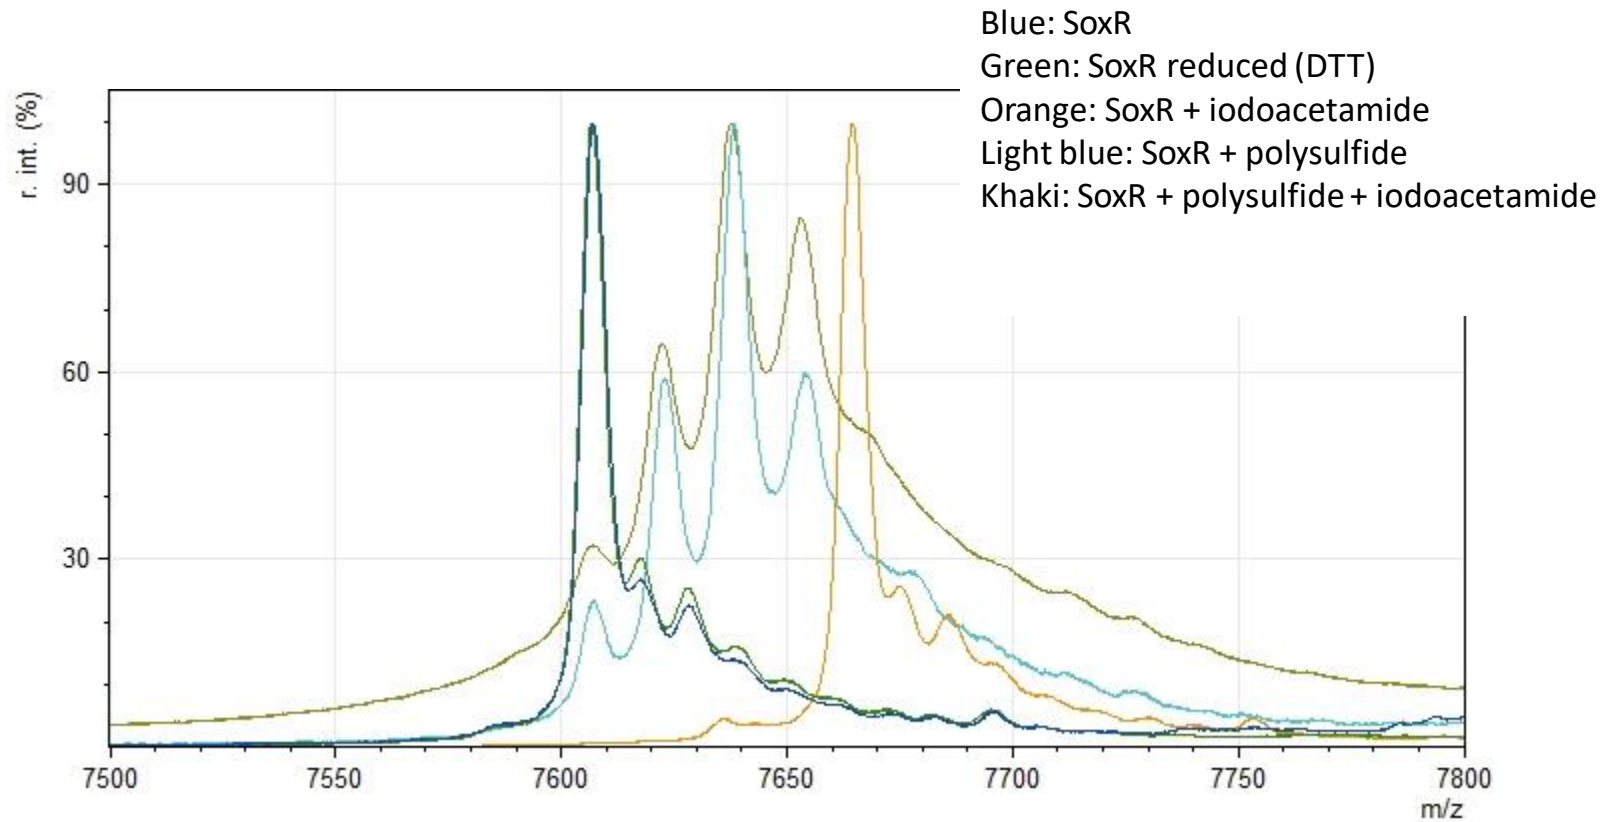

Mass spectra obtained for the  $\text{CuCl}_2$  oxidized protein were almost identical to those for the as isolated protein and are not shown for clarity.

## SoxR Cys<sup>50</sup>Ser

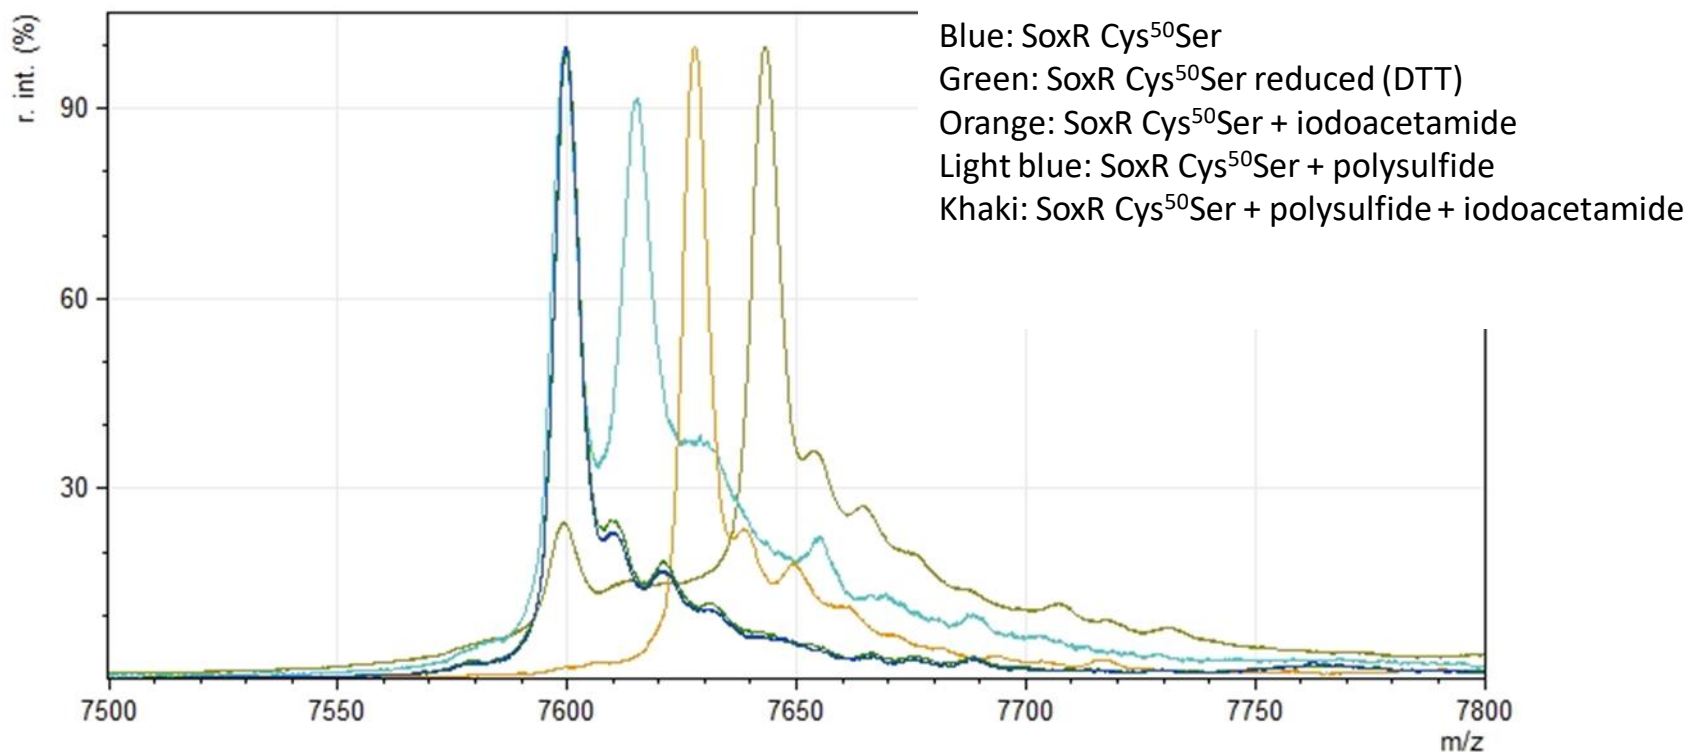

Mass spectra obtained for the CuCl<sub>2</sub> oxidized protein were almost identical to those for the as isolated protein and are not shown for clarity.

## SoxR Cys<sup>116</sup>Ser

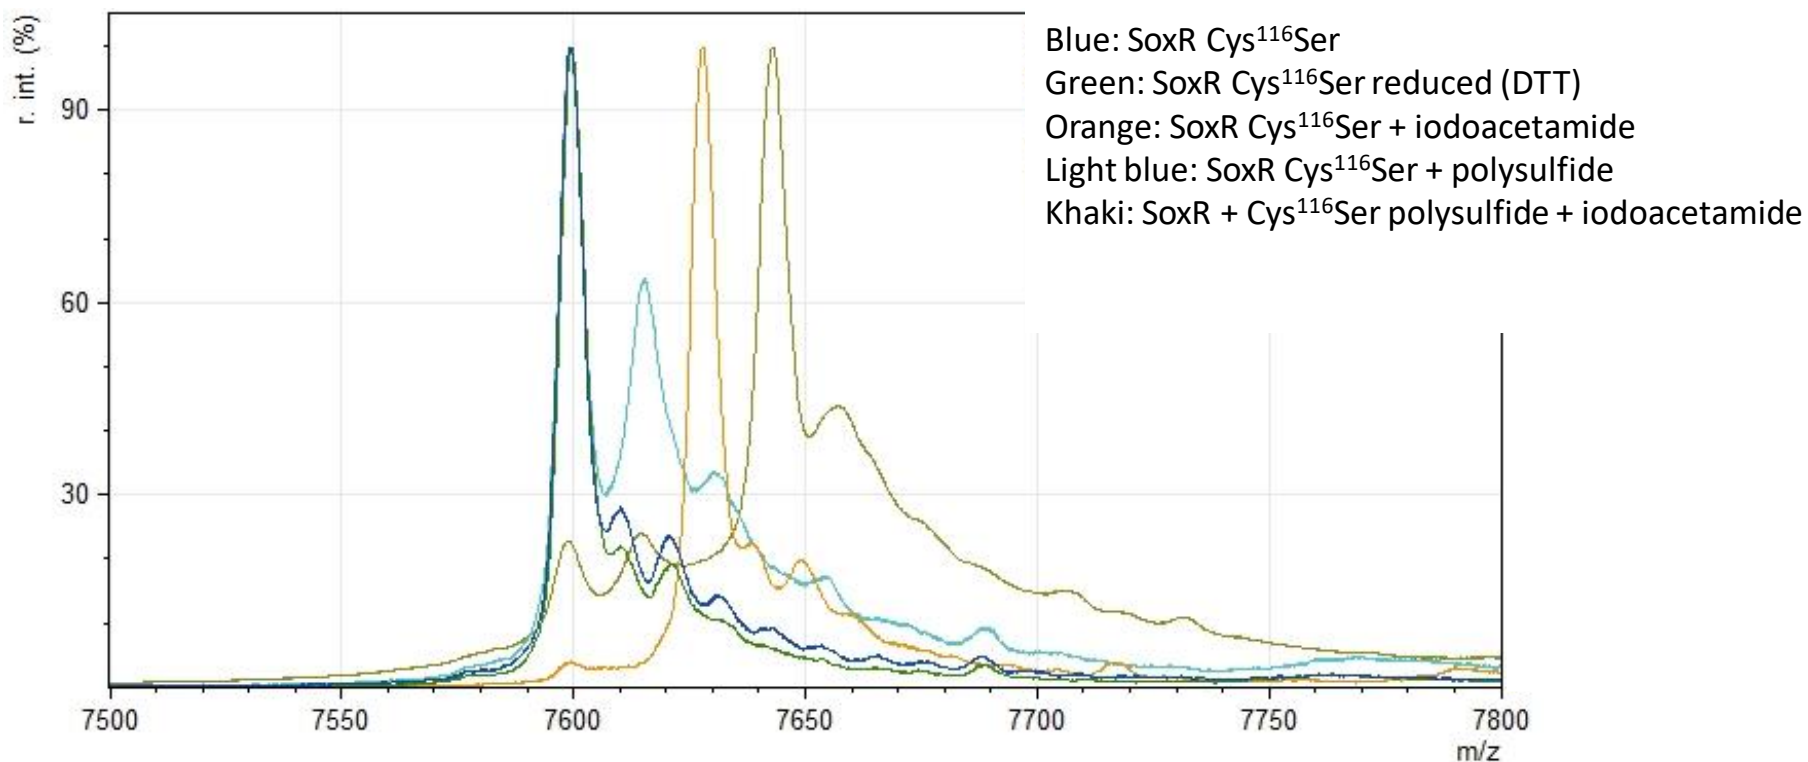

Mass spectra obtained for the CuCl<sub>2</sub> oxidized protein were almost identical to those for the as isolated protein and are not shown for clarity.

## SoxR Cys<sup>50</sup>Ser Cys<sup>116</sup>Ser

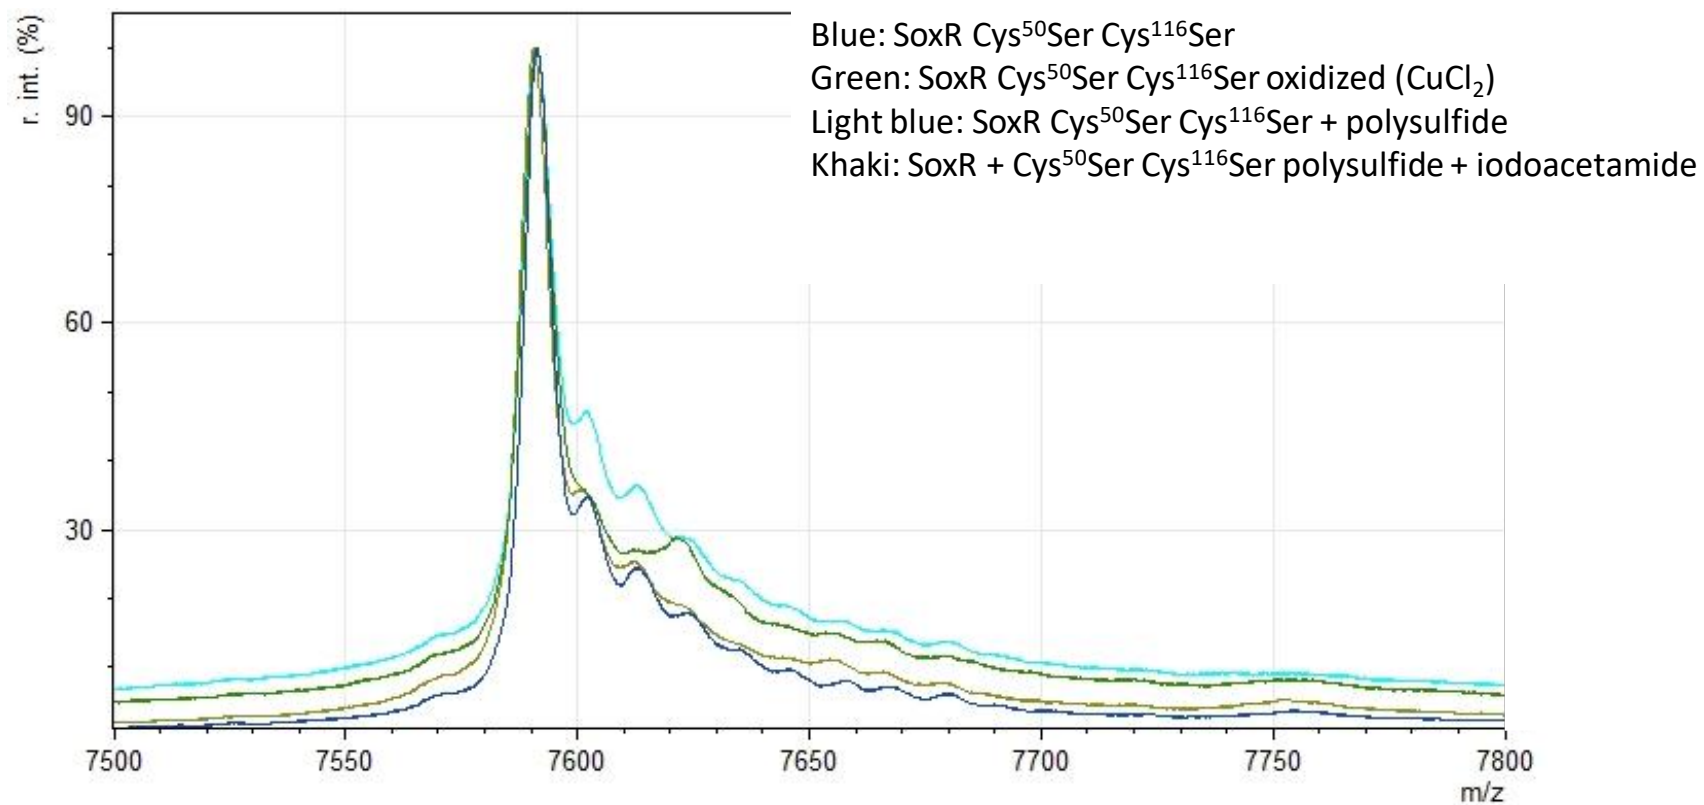

Supplement: Supplementary file 2 [file supplementary]
